# Supplementary material for: Paul J. Crutzen – interactions with friends and colleagues
Source: Copernicus journal article supplement (doi:10.5194/hgss-2025-2), 2025-06-10
Supplement: Supplementary file [file hgss-2025-2-AC1-supplement.pdf]

## Reply to comments on:

### “Paul J. Crutzen – interactions with friends and colleagues”

We thank Ravi very much for reading the paper and for his valuable comments that helped improving the paper. The response to the comments is listed below, with the line numbers referring to the submitted (preprint) version.

- l. 2: But  $\longrightarrow$  And (as suggested)
- l. 6: less visible, when focusing on his (many) scientific  $\longrightarrow$  obscured, when only focusing on his (many) scientific ... (as suggested)
- l. 10: changed to “to a majority of the atmosphere” – as suggested
- l. 33: changed to “scientific grandchildren and great grandchildren” – as suggested
- l. 38 ff: the new text reads “The idea of the present contribution is not to enhance previous biographical texts, but rather to complement this information with personal accounts of an interaction with Paul by a number of his colleagues and friends. The interaction of scientists with Paul had profound influences on our science through Paul’s educational and human developments” – as suggested.
- l. 151 ff.: Discussion on German CFC production: (after consultation with J. Burrows): We agree with the review that there is some detail here; however, the fact that Germany contributed a substantial fraction of the global CFC production is relevant insofar as it led to policy action (e.g. the German (BMFT) research programs and the German voice in ESA business). Thus we left most material in the paper – we have, however, shortened the text a bit and removed the numbers on CFC-113 and CFC-114.
- l. 190 ff: Paul’s role at MPIC: (after consultation with R. Jaenicke): We agree with the review that Paul’s role should be clear here. Paul was the acting director at this time and decisions on who should lead the electronic workshop were his responsibility. This aspect has been clarified in the revised version.
